# Supplementary material for: Polyvinyl Alcohol/Polyaniline/Carboxylated Graphene Oxide Nanocomposites for Coating Protection of Cast Iron in Simulated Seawater
Source: MDPI journal article supplement (doi:10.3390/polym14091791), 2022-04-27
Supplement: s1 [file s1]

## **Polyvinyl alcohol/Polyaniline/Carboxylated Graphene Oxide Nanocomposites for Coating Protection of Cast Iron in Simulated Seawater**

**Noha A. Elessawy<sup>\*1</sup>, Marwa H. Gouda<sup>\*2</sup>, Mohamed Elnouby<sup>3</sup>, Nahla A. Taha<sup>4</sup>, M. Elsayed Youssef<sup>1</sup>, Diogo M.F. Santos<sup>5</sup>**

<sup>1</sup> Computer Based Engineering Applications Dept., Informatics Research Institute IRI, City of Scientific Research & Technological Applications (SRTA-City), 21934 Alexandria, Egypt; [nony\\_essawy@yahoo.com](mailto:nony_essawy@yahoo.com), [elsayed168@gmail.com](mailto:elsayed168@gmail.com)

<sup>2</sup> Polymer Materials Research Department, Advanced Technology and New Materials Research Institute, City of Scientific Research and Technological Applications (SRTA-City), 21934 Alexandria, Egypt; [marwagouda777@yahoo.com](mailto:marwagouda777@yahoo.com)

<sup>3</sup> Nanomaterials and Composites Research Department, Advanced Technology and New Materials Research Institute, City of Scientific Research and Technological Applications (SRTA-City), 21934 Alexandria, Egypt; [mnano2050@yahoo.com](mailto:mnano2050@yahoo.com)

<sup>4</sup> Modelling and Simulation research Department, Advanced Technology and New Materials Research Institute (ATNMRI), City of Scientific Research and Technological Applications (SRTA-City), 21934 Alexandria, Egypt; [nahlataha\\_1982@yahoo.com](mailto:nahlataha_1982@yahoo.com)

<sup>5</sup> Center of Physics and Engineering of Advanced Materials, Laboratory for Physics of Materials and Emerging Technologies, Chemical Engineering Department, Instituto Superior Técnico, Universidade de Lisboa, 1049-001 Lisbon, Portugal; [diogosantos@tecnico.ulisboa.pt](mailto:diogosantos@tecnico.ulisboa.pt)

\* corresponding authors: [nony\\_essawy@yahoo.com](mailto:nony_essawy@yahoo.com); [marwagouda777@yahoo.com](mailto:marwagouda777@yahoo.com)

**Table S1:** Level of various independent variables at coded values of response surface methodology experimental design.

| Symbol | Independent variables                             | Coded levels |    |     |
|--------|---------------------------------------------------|--------------|----|-----|
|        |                                                   | -1           | 0  | 1   |
| A      | Time / day                                        | 4            | 8  | 12  |
| B      | Temperature / °                                   | 25           | 35 | 45  |
| C      | NaCl solution concentration / mol L <sup>-1</sup> | 0.5          | 1  | 1.5 |

**Table S2:** The Box-Behnken design matrix and results for the three variables that influenced on Inhibition efficiency (%) of PVA/PANI/GO-COOH nanocomposite coating

| Trial | Time<br>(A; day) | Temperature<br>(B; °C) | NaCl solution concentration<br>(C; mol L <sup>-1</sup> ) | Inhibition efficiency (%) |           |
|-------|------------------|------------------------|----------------------------------------------------------|---------------------------|-----------|
|       |                  |                        |                                                          | Measured                  | Predicted |
| 1     | 8                | 45                     | 0.5                                                      | 79                        | 80.04     |
| 2     | 12               | 35                     | 0.5                                                      | 76                        | 72.75     |
| 3     | 12               | 45                     | 1                                                        | 61                        | 63.21     |
| 4     | 12               | 35                     | 1.5                                                      | 62                        | 61.83     |
| 5     | 4                | 45                     | 1                                                        | 82                        | 80.79     |
| 6     | 4                | 25                     | 1                                                        | 87                        | 84.79     |
| 7     | 8                | 35                     | 1                                                        | 78                        | 78        |
| 8     | 8                | 35                     | 1                                                        | 78                        | 78        |
| 9     | 8                | 35                     | 1                                                        | 78                        | 78        |
| 10    | 8                | 25                     | 1.5                                                      | 72                        | 70.96     |
| 11    | 4                | 35                     | 1.5                                                      | 69                        | 72.25     |
| 12    | 8                | 35                     | 1                                                        | 78                        | 78        |
| 13    | 4                | 35                     | 0.5                                                      | 92.3                      | 92.48     |
| 14    | 8                | 35                     | 1                                                        | 78                        | 78        |
| 15    | 8                | 25                     | 0.5                                                      | 86                        | 88.04     |
| 16    | 12               | 25                     | 1                                                        | 71                        | 72.21     |
| 17    | 8                | 45                     | 1.5                                                      | 68                        | 65.96     |

**Table S3:** ANOVA analysis for response function Y (inhibition efficiency (%)).

| Source                            | Sum of squares | df | Mean square | F-value | p-value  |
|-----------------------------------|----------------|----|-------------|---------|----------|
| Model                             | 1081.68        | 9  | 120.19      | 18.96   | 0.0004   |
| A-Time                            | 454.51         | 1  | 454.51      | 71.70   | < 0.0001 |
| B-Temperature                     | 84.50          | 1  | 84.50       | 13.33   | 0.0082   |
| C- NaCl solution<br>concentration | 485.16         | 1  | 485.16      | 76.54   | < 0.0001 |
| AB                                | 6.25           | 1  | 6.25        | 0.9860  | 0.3538   |
| AC                                | 21.62          | 1  | 21.62       | 3.41    | 0.1073   |
| BC                                | 2.25           | 1  | 2.25        | 0.3549  | 0.5701   |
| A <sup>2</sup>                    | 18.35          | 1  | 18.35       | 2.89    | 0.1327   |
| B <sup>2</sup>                    | 1.85           | 1  | 1.85        | 0.2915  | 0.6060   |
| C <sup>2</sup>                    | 4.98           | 1  | 4.98        | 0.7856  | 0.4049   |
| Residual                          | 44.37          | 7  | 6.34        |         |          |
| Lack of Fit                       | 44.37          | 3  | 14.79       |         |          |
| Pure Error                        | 0.0000         | 4  | 0.0000      |         |          |
| Cor Total                         | 1126.05        | 16 |             |         |          |

|                  |       |                                |         |
|------------------|-------|--------------------------------|---------|
| <b>Std. Dev.</b> | 2.52  | <b>R<sup>2</sup></b>           | 0.9606  |
| <b>Mean</b>      | 76.19 | <b>Adjusted R<sup>2</sup></b>  | 0.9099  |
| <b>C.V. %</b>    | 3.30  | <b>Predicted R<sup>2</sup></b> | 0.3695  |
|                  |       | <b>Adeq. Precision</b>         | 15.8726 |
